# Supplementary material for: Cardiovascular morbidity and all-cause mortality in patients with retinal vein occlusion: a Danish nationwide cohort study
Source: HighWire-hosted journal article supplement (doi:10.1136/bjophthalmol-2022-321225), 2022-05-10

| <b>Suppl. table 1: Codebook of diagnostic codes (ICD) and ATC codes applied in the study of associations between RVO and CVD and mortality</b> |                                             |                                                 |                                                  |                                                           |                                                                                                                                                              |
|------------------------------------------------------------------------------------------------------------------------------------------------|---------------------------------------------|-------------------------------------------------|--------------------------------------------------|-----------------------------------------------------------|--------------------------------------------------------------------------------------------------------------------------------------------------------------|
| <b>ICD-8 and ICD-10 codes for RVO exposure group</b>                                                                                           |                                             |                                                 |                                                  |                                                           |                                                                                                                                                              |
| <b>Exposure group</b>                                                                                                                          | <b>ICD8</b>                                 | <b>ICD10</b>                                    | <b>ATC</b>                                       | <b>Additional criteria</b>                                |                                                                                                                                                              |
| <i>RVO</i>                                                                                                                                     | 37703                                       | DH348*                                          | Not applied                                      | Only if registered at ophthalmology associated department |                                                                                                                                                              |
| <i>BRVO</i>                                                                                                                                    |                                             | DH348C                                          | Not applied                                      | Only if registered at ophthalmology associated department |                                                                                                                                                              |
| <i>CRVO</i>                                                                                                                                    |                                             | DH348D, DH348F                                  | Not applied                                      | Only if registered at ophthalmology associated department |                                                                                                                                                              |
| <b>ICD-8 and ICD-10 codes for CVD outcome group</b>                                                                                            |                                             |                                                 |                                                  |                                                           |                                                                                                                                                              |
| <b>Outcome group</b>                                                                                                                           | <b>Diagnosis</b>                            | <b>ICD8</b>                                     | <b>ICD10</b>                                     | <b>ATC</b>                                                | <b>Additional criteria</b>                                                                                                                                   |
| <b>CVD</b>                                                                                                                                     | <i>All below</i>                            | All below                                       | All below                                        | Not applied                                               |                                                                                                                                                              |
| <b>Ischemic CVD</b>                                                                                                                            | <i>Acute myocardial infarction</i>          | 410*                                            | I21*- I22*, I23*, I240*-I241*, I248, I249*       | Not applied                                               | None                                                                                                                                                         |
|                                                                                                                                                | <i>Atherosclerotic heart disease</i>        | 411*, 413*                                      | I20*, I251, I258, I259                           | Not applied                                               | None                                                                                                                                                         |
|                                                                                                                                                | <i>Coronary artery bypass graft</i>         | N/A                                             | KFNA*-KFNF*, KFNH*, KFNJ*-KFNK*, KFNW*           | Not applied                                               | None                                                                                                                                                         |
|                                                                                                                                                | <i>Ischemic stroke</i>                      | 433*-436*                                       | I63*-I64*, G458, G459                            | Not applied                                               | None                                                                                                                                                         |
|                                                                                                                                                | <i>Peripheral arterial disease</i>          | 445*                                            | I702, I702A, I739A, I739C                        | Not applied                                               | Only as primary diagnosis                                                                                                                                    |
|                                                                                                                                                | <i>Other arterial occlusion</i>             | 444*                                            | I74*                                             | Not applied                                               | None                                                                                                                                                         |
| <b>Non-ischemic CVD</b>                                                                                                                        | <i>Non-ischemic heart failure</i>           | 42709, 42710, 42711, 42719, 42899, 78249        | I110, I130, I132, I420, I429, I500*-I501*, I509* | Not applied                                               | Only as primary diagnosis AND EXCLUDED if any prior diagnosis of acute myocardial infarction, atherosclerotic heart disease or coronary artery bypass graft. |
|                                                                                                                                                | <i>Pulmonary hypertension - idiopathic</i>  | 426*                                            | I270                                             | Not applied                                               | None                                                                                                                                                         |
|                                                                                                                                                | <i>Atrial fibrillation / atrial flutter</i> | 42793, 42794                                    | I48*                                             | Not applied                                               | None                                                                                                                                                         |
|                                                                                                                                                | <i>Non-ischemic stroke</i>                  | 430*, 431*                                      | I60*-I62*                                        | Not applied                                               | None                                                                                                                                                         |
|                                                                                                                                                | <i>Aortic dissection</i>                    | 44109                                           | I710*                                            | Not applied                                               | None                                                                                                                                                         |
|                                                                                                                                                | <i>Aortic dilation/aneurysm</i>             | 44110, 44111, 44119, 44120, 44121, 44129, 44199 | I711*-I716*, I718*-I719*                         | Not applied                                               | None                                                                                                                                                         |
|                                                                                                                                                | <i>Aortic stenosis</i>                      | 39590, 39592, 39603, 39604, 39690, 39693, 39694 | I060, I062, I350, I352                           | Not applied                                               | None                                                                                                                                                         |

| ICD-8 and ICD-10 codes for CVD outcome group |                                                        |                                              |                                                                                                                                                                                                                                                                                                                                                                         |                                                                                                                                                                                                                                                                                                                                                                                                                                                                                      |                     |
|----------------------------------------------|--------------------------------------------------------|----------------------------------------------|-------------------------------------------------------------------------------------------------------------------------------------------------------------------------------------------------------------------------------------------------------------------------------------------------------------------------------------------------------------------------|--------------------------------------------------------------------------------------------------------------------------------------------------------------------------------------------------------------------------------------------------------------------------------------------------------------------------------------------------------------------------------------------------------------------------------------------------------------------------------------|---------------------|
| Outcome group                                | Diagnosis                                              | ICD8                                         | ICD10                                                                                                                                                                                                                                                                                                                                                                   | ATC                                                                                                                                                                                                                                                                                                                                                                                                                                                                                  | Additional criteria |
| <b>Venous occlusion</b>                      | <i>Pulmonary hypertension (chronic thromboembolic)</i> | 426*                                         | I272                                                                                                                                                                                                                                                                                                                                                                    | Not applied                                                                                                                                                                                                                                                                                                                                                                                                                                                                          | None                |
|                                              | <i>Cerebral venous thrombosis</i>                      | N/A                                          | I676*                                                                                                                                                                                                                                                                                                                                                                   | Not applied                                                                                                                                                                                                                                                                                                                                                                                                                                                                          | None                |
|                                              | <i>Deep venous thrombosis</i>                          | 45100, 45108, 45109                          | I801*-I803*                                                                                                                                                                                                                                                                                                                                                             | Not applied                                                                                                                                                                                                                                                                                                                                                                                                                                                                          | None                |
|                                              | <i>Pulmonary embolism</i>                              | 45099                                        | I26, I260, I269*                                                                                                                                                                                                                                                                                                                                                        | Not applied                                                                                                                                                                                                                                                                                                                                                                                                                                                                          | None                |
| ICD-8 and ICD-10 codes for covariates        |                                                        |                                              |                                                                                                                                                                                                                                                                                                                                                                         |                                                                                                                                                                                                                                                                                                                                                                                                                                                                                      |                     |
| Covariate                                    | ICD8                                                   | ICD10                                        | ATC                                                                                                                                                                                                                                                                                                                                                                     | Additional criteria                                                                                                                                                                                                                                                                                                                                                                                                                                                                  |                     |
| <i>Diabetes mellitus</i>                     | 249*, 250*                                             | E10*-E14*                                    | A10A*, A10B*                                                                                                                                                                                                                                                                                                                                                            | Patients with a minimum of 2 medicine prescriptions of A10A or A10B within 12 months OR ICD10 E10* or ICD8 249* or 250* AND age <30 yrs at time of diagnosis AND at least one A10A ATC prescription OR At least two registrations of ICD10 E11* OR At least one registration of ICD10 E12*-E14*<br>EXCLUDED if ICD diagnosis or ATC prescription is within 12 months after a registration of ICD10 DO244/ICD8 63747 (Gestational diabetes) OR ever diagnosed with PCOS: ICD10 DE28.2 |                     |
| <i>Dyslipidemia</i>                          | 27900-27901, 27200-27201                               | E78*                                         | C10*                                                                                                                                                                                                                                                                                                                                                                    | Any registration of ICD E78* AND/OR Two prescriptions of ATC C10 within 12 months, WITHOUT a previous registration of ICD I21*-I22*, I240*-I241*, I248 eller I249*                                                                                                                                                                                                                                                                                                                   |                     |
| <i>Chronic obstructive pulmonary disease</i> |                                                        | J44*, J96*, J13*-18*                         | Not applied                                                                                                                                                                                                                                                                                                                                                             | J44 only as A-diagnosis and if patient is >30 years at diagnosis AND/OR J96 as A-diagnosis AND ONLY in combination with J44 as B-diagnosis AND/OR J13-18 as A-diagnosis AND ONLY in combination with J44 as B-diagnosis                                                                                                                                                                                                                                                              |                     |
| <i>Arterial hypertension</i>                 | 400*-404*                                              | I10*, I11, I119*, I12*, I13, I131, I139, I15 | α adrenergic blockers (C02A*, C02B*, C02C*)<br>non-loop diuretics (C02DA*, C02L*, C03A*, C03B*, C03D*, C03E*, C03X*, C07C*, C07D*, C08G*, C09BA*, C09DA*, C09XA52)<br>vasodilators (C02DB*, C02DD*, C02DG*)<br>β blockers (C07*, MC09BX02, MC09BX04, MC09BX05)<br>calcium channel blockers (C07FB*, C08*, C09BB*, C09DB*)<br>renin-angiotensin system inhibitors (C09*) | ICD code AND/OR Combination treatment (prescribed within 6 months) with at least two different groups of antihypertensive medication, each prescribed at least twice within 12 months                                                                                                                                                                                                                                                                                                |                     |

\*: subgroups included. HR= Hazard ratio, ICD= International Classification of Diseases, ATC= Anatomical Therapeutic Chemical code, RVO= Retinal vein occlusion, BRVO= Branch retinal vein occlusion, CRVO= Central retinal vein occlusion, CVD= Cardiovascular diseases

**Suppl. table 2: Hazard ratios of CVDs and all-cause mortality of patients with RVO, BRVO and CRVO compared to individuals without RVO**

|                            | <b>RVO</b>       | <b>BRVO</b>      | <b>CRVO</b>      |
|----------------------------|------------------|------------------|------------------|
| <b>CVD</b>                 |                  |                  |                  |
| Crude HR (95% CI)          | 1.29 (1.24;1.33) | 1.22 (1.10;1.34) | 1.23 (1.10;1.37) |
| Adjusted HR (95% CI)*      | 1.29 (1.25;1.34) | 1.26 (1.14;1.39) | 1.22 (1.10;1.36) |
| Adjusted HR (95% CI)**     | 1.13 (1.09;1.17) | 1.14 (1.03;1.25) | 1.12 (1.00;1.25) |
| <b>Ischemic CVD</b>        |                  |                  |                  |
| Crude HR (95% CI)          | 1.26 (1.21;1.32) | 1.14 (1.02;1.29) | 1.12 (0.99;1.28) |
| Adjusted HR (95% CI)*      | 1.36 (1.30;1.42) | 1.36 (1.20;1.52) | 1.27 (1.11;1.44) |
| Adjusted HR (95% CI)**     | 1.16 (1.11;1.21) | 1.18 (1.05;1.33) | 1.12 (0.99;1.28) |
| <b>Non-ischemic CVD</b>    |                  |                  |                  |
| Crude HR (95% CI)          | 1.44 (1.33;1.55) | 1.40 (1.23;1.59) | 1.38 (1.18;1.60) |
| Adjusted HR (95% CI)*      | 1.32 (1.23;1.42) | 1.29 (1.13;1.46) | 1.24 (1.07;1.44) |
| Adjusted HR (95% CI)**     | 1.23 (1.15;1.33) | 1.22 (1.07;1.38) | 1.16 (1.00;1.35) |
| <b>Venous disease</b>      |                  |                  |                  |
| Crude HR (95% CI)          | 1.17 (1.06;1.28) | 1.21 (0.95;1.56) | 1.15 (0.87;1.51) |
| Adjusted HR (95% CI)*      | 1.07 (0.97;1.17) | 1.02 (0.79;1.31) | 0.97 (0.74;1.28) |
| Adjusted HR (95% CI)**     | 0.99 (0.90;1.09) | 0.99 (0.78;1.28) | 0.91 (0.69;1.20) |
| <b>All-cause mortality</b> |                  |                  |                  |
| Crude HR (95% CI)          | 1.03 (1.00;1.06) | 0.84 (0.78;0.92) | 1.10 (1.02;1.19) |
| Adjusted HR (95% CI)*      | 1.09 (1.06;1.12) | 0.97 (0.89;1.05) | 1.20 (1.12;1.30) |
| Adjusted HR (95% CI)**     | 1.00 (0.97;1.03) | 0.95 (0.87;1.03) | 1.12 (1.04;1.21) |

\*: adjusted for sex, age at entry. \*\*: adjusted for sex, age at entry, index year, marital status at entry, diabetes, hypertension, chronic obstructive pulmonary disorders, dyslipidemia and Charlson comorbidity index conditions. RVO= Retinal vein occlusion, BRVO= Branch retinal vein occlusion, CRVO= Central retinal vein occlusion, CVD= Cardiovascular diseases

**Suppl. table 3: Hazard ratios of CVDs and all-cause mortality of individuals with RVO, BRVO and CRVO prior to and after March 17th 2011 compared to individuals without RVO**

|                            | RVO<br>prior to 2011 | RVO<br>after 2011 | BRVO<br>prior to 2011 | BRVO<br>after 2011 | CRVO<br>prior to 2011 | CRVO<br>after 2011 |
|----------------------------|----------------------|-------------------|-----------------------|--------------------|-----------------------|--------------------|
| <b>CVD</b>                 |                      |                   |                       |                    |                       |                    |
| Crude HR (95% CI)          | 1.29 (1.24;1.35)     | 1.26 (1.18;1.35)  | 1.25 (1.04;1.50)      | 1.21 (1.07;1.35)   | 1.22 (1.03;1.46)      | 1.23 (1.07;1.41)   |
| Adjusted HR (95% CI)*      | 1.29 (1.23;1.34)     | 1.30 (1.21;1.39)  | 1.28 (1.06;1.54)      | 1.25 (1.11;1.40)   | 1.20 (1.01;1.43)      | 1.24 (1.08;1.42)   |
| Adjusted HR (95% CI)**     | 1.10 (1.06;1.15)     | 1.19 (1.11;1.28)  | 1.10 (0.92;1.32)      | 1.15 (1.02;1.29)   | 1.08 (0.91;1.29)      | 1.14 (0.99;1.31)   |
| <b>Ischemic CVD</b>        |                      |                   |                       |                    |                       |                    |
| Crude HR (95% CI)          | 1.33 (1.27;1.40)     | 1.10 (1.01;1.19)  | 1.25 (1.00;1.55)      | 1.11 (0.96;1.27)   | 1.17 (0.95;1.44)      | 1.10 (0.93;1.30)   |
| Adjusted HR (95% CI)*      | 1.38 (1.31;1.45)     | 1.31 (1.21;1.43)  | 1.41 (1.13;1.75)      | 1.33 (1.16;1.53)   | 1.24 (1.01;1.53)      | 1.28 (1.09;1.51)   |
| Adjusted HR (95% CI)**     | 1.15 (1.10;1.21)     | 1.17 (1.07;1.27)  | 1.19 (0.96;1.48)      | 1.18 (1.02;1.35)   | 1.08 (0.88;1.33)      | 1.15 (0.98;1.36)   |
| <b>Non-ischemic CVD</b>    |                      |                   |                       |                    |                       |                    |
| Crude HR (95% CI)          | 1.30 (1.24;1.36)     | 1.44 (1.33;1.55)  | 1.30 (1.05;1.61)      | 1.40 (1.23;1.59)   | 1.22 (1.00;1.48)      | 1.38 (1.18;1.60)   |
| Adjusted HR (95% CI)*      | 1.25 (1.19;1.31)     | 1.32 (1.23;1.42)  | 1.25 (1.01;1.54)      | 1.29 (1.13;1.46)   | 1.13 (0.93;1.38)      | 1.24 (1.07;1.44)   |
| Adjusted HR (95% CI)**     | 1.06 (1.01;1.12)     | 1.24 (1.15;1.33)  | 1.06 (0.86;1.31)      | 1.22 (1.07;1.38)   | 1.00 (0.82;1.21)      | 1.16 (1.00;1.35)   |
| <b>Venous disease</b>      |                      |                   |                       |                    |                       |                    |
| Crude HR (95% CI)          | 1.13 (1.01;1.27)     | 1.26 (1.06;1.50)  | 1.59 (1.04;2.41)      | 1.08 (0.79;1.47)   | 1.13 (0.72;1.77)      | 1.16 (0.81;1.64)   |
| Adjusted HR (95% CI)*      | 1.08 (0.97;1.21)     | 1.04 (0.87;1.23)  | 1.41 (0.93;2.14)      | 0.88 (0.65;1.21)   | 1.03 (0.65;1.61)      | 0.94 (0.66;1.34)   |
| Adjusted HR (95% CI)**     | 0.99 (0.89;1.11)     | 0.98 (0.83;1.17)  | 1.38 (0.91;2.10)      | 0.86 (0.63;1.18)   | 0.98 (0.62;1.53)      | 0.87 (0.61;1.24)   |
| <b>All-cause mortality</b> |                      |                   |                       |                    |                       |                    |
| Crude HR (95% CI)          | 1.07 (1.04;1.11)     | 0.91 (0.86;0.96)  | 0.96 (0.82;1.12)      | 0.80 (0.73;0.89)   | 1.21 (1.08;1.35)      | 1.03 (0.93;1.14)   |
| Adjusted HR (95% CI)*      | 1.10 (1.07;1.13)     | 1.04 (0.99;1.10)  | 1.06 (0.91;1.24)      | 0.93 (0.84;1.03)   | 1.26 (1.12;1.41)      | 1.16 (1.05;1.29)   |
| Adjusted HR (95% CI)**     | 1.01 (0.98;1.04)     | 0.97 (0.91;1.02)  | 0.96 (0.82;1.13)      | 0.94 (0.85;1.04)   | 1.41 (1.25;1.58)      | 0.97 (0.87;1.07)   |

\*: adjusted for sex, age at entry. \*\*: adjusted for sex, age at entry, index year, marital status at entry, diabetes, hypertension, chronic obstructive pulmonary disorders, dyslipidemia and Charlson comorbidity index conditions. RVO= Retinal vein occlusion, BRVO= Branch retinal vein occlusion, CRVO= Central retinal vein occlusion, CVD= Cardiovascular diseases

**Suppl. table 4: Number of events, time to event, age at event, total risk time and event rates for all RVO, BRVO, CRVO and not RVO exposed**

|                                                        | RVO             | BRVO            | CRVO            | Not RVO exposed |
|--------------------------------------------------------|-----------------|-----------------|-----------------|-----------------|
| <b>CVD</b>                                             |                 |                 |                 |                 |
| No. of CVD events                                      | 2,983           | 398             | 329             | 912,702         |
| Time to CVD (yrs)                                      | 3.7(1.5;7.2)    | 2.5(1.2;4.3)    | 2.5(0.9;4.6)    | 9.5(4.7;14.8)   |
| Age at CVD diagnosis (yrs)                             | 77.3(69.6;83.9) | 74.7(67.1;82.0) | 77.2(70.0;83.5) | 69.1(58.9;78.5) |
| Total risk time (person-years at risk)                 | 59,743          | 9,071           | 7,145           | 49,569,145      |
| Rate of CVD per 1000 person-years at risk              | 49.9            | 43.9            | 46.0            | 18.4            |
| <b>Ischemic CVD</b>                                    |                 |                 |                 |                 |
| No. of ischemic CVD events                             | 2,152           | 278             | 228             | 631,619         |
| Time to ischemic CVD (yrs)                             | 3.7(1.5;7.2)    | 2.2(1.0;4.1)    | 2.3(0.8;4.7)    | 8.8(4.4;14.1)   |
| Age at ischemic CVD diagnosis (yrs)                    | 77.3(69.2;83.8) | 75.0(67.0;81.8) | 77.8(71.1;83.5) | 69.0(58.9;78.6) |
| Total risk time (person-years at risk)                 | 69,842          | 10,595          | 8,517           | 52,159,479      |
| Rate of ischemic CVD per 1000 person-years at risk     | 30.8            | 26.2            | 26.8            | 12.1            |
| <b>Non-ischemic CVD</b>                                |                 |                 |                 |                 |
| No. of non-ischemic CVD events                         | 2,396           | 322             | 270             | 533,272         |
| Time to non-ischemic CVD (yrs)                         | 4.2(1.8;7.9)    | 2.5(1.2;4.2)    | 2.5(0.9;4.6)    | 10.9(5.6;16.0)  |
| Age at non-ischemic CVD diagnosis (yrs)                | 79.3(72.2;85.1) | 76.7(69.0;83.5) | 79.0(71.0;85.4) | 73.9(64.7;81.8) |
| Total risk time (person-years at risk)                 | 79,326          | 11,442          | 9,327           | 55,265,430      |
| Rate of non-ischemic CVD per 1000 person-years at risk | 30.2            | 28.1            | 28.9            | 9.6             |
| <b>Venous disease</b>                                  |                 |                 |                 |                 |
| No. of venous disease events                           | 438             | 62              | 50              | 126,579         |
| Time to venous disease (yrs)                           | 3.8(1.6;7.6)    | 2.9(1.6;5.0)    | 2.3(1.4;4.0)    | 11.1(5.9;16.1)  |
| Age at venous disease diagnosis (yrs)                  | 77.1(71.1;84.0) | 74.2(70.1;82.8) | 77.8(70.0;85.1) | 69.4(58.4;78.8) |
| Total risk time (person-years at risk)                 | 93,748          | 13,508          | 11,128          | 57,658,861      |
| Rate of venous disease per 1000 person-years at risk   | 4.7             | 4.6             | 4.5             | 2.2             |
| <b>All-cause mortality</b>                             |                 |                 |                 |                 |
| No. of deaths                                          | 5216            | 537             | 662             | 1,128,488       |
| Time to death (yrs)                                    | 4.9(2.3;8.7)    | 3.1(1.3;4.8)    | 2.9(1.3;5.1)    | 9.9(4.8;15.2)   |
| Age at death (yrs)                                     | 83.8(77.1;89.4) | 82.2(75.4;88.8) | 83.9(77.2;89.4) | 79.7(69.6;87.2) |
| Total risk time (person-years at risk)                 | 97,889          | 14,060          | 11,657          | 58,809,748      |
| Mortality rate (deaths/1000 person-years)              | 53.3            | 38.2            | 56.8            | 19.2            |

Time and age presented as median (25%;75% percentile). RVO= Retinal vein occlusion, BRVO= Branch retinal vein occlusion, CRVO= Central retinal vein occlusion, CVD= Cardiovascular diseases, yrs= years

**Suppl. table 5: Hazard ratios of CVDs and all-cause mortality of individuals with RVO, BRVO and CRVO compared to individuals without RVO in women and men**

|                            | RVO              |                  | BRVO             |                  | CRVO             |                  |
|----------------------------|------------------|------------------|------------------|------------------|------------------|------------------|
|                            | Women            | Men              | Women            | Men              | Women            | Men              |
| <b>CVD</b>                 |                  |                  |                  |                  |                  |                  |
| Crude HR (95% CI)          | 1.30 (1.23;1.36) | 1.30 (1.24;1.35) | 1.19 (1.03;1.37) | 1.26 (1.05;1.52) | 1.29 (1.10;1.50) | 1.21 (1.02;1.44) |
| Adjusted HR (95% CI)*      | 1.33 (1.27;1.40) | 1.29 (1.24;1.35) | 1.26 (1.09;1.45) | 1.29 (1.08;1.55) | 1.35 (1.16;1.58) | 1.19 (1.00;1.42) |
| Adjusted HR (95% CI)**     | 1.15 (1.09;1.21) | 1.10 (1.06;1.15) | 1.13 (0.98;1.30) | 1.11 (0.92;1.33) | 1.18 (1.01;1.38) | 1.06 (0.89;1.26) |
| <b>Ischemic CVD</b>        |                  |                  |                  |                  |                  |                  |
| Crude HR (95% CI)          | 1.27 (1.20;1.35) | 1.33 (1.27;1.40) | 1.12 (0.94;1.32) | 1.25 (1.00;1.55) | 1.19 (0.98;1.44) | 1.15 (0.94;1.42) |
| Adjusted HR (95% CI)*      | 1.41 (1.33;1.50) | 1.38 (1.31;1.45) | 1.38 (1.16;1.63) | 1.41 (1.14;1.76) | 1.43 (1.18;1.73) | 1.23 (1.00;1.51) |
| Adjusted HR (95% CI)**     | 1.18 (1.11;1.25) | 1.15 (1.09;1.20) | 1.20 (1.01;1.43) | 1.18 (0.95;1.46) | 1.21 (1.00;1.46) | 1.05 (0.85;1.30) |
| <b>Non-ischemic CVD</b>    |                  |                  |                  |                  |                  |                  |
| Crude HR (95% CI)          | 1.33 (1.26;1.41) | 1.30 (1.24;1.37) | 1.36 (1.16;1.60) | 1.32 (1.07;1.63) | 1.27 (1.06;1.52) | 1.21 (0.99;1.47) |
| Adjusted HR (95% CI)*      | 1.30 (1.23;1.38) | 1.26 (1.20;1.32) | 1.29 (1.10;1.52) | 1.27 (1.02;1.56) | 1.21 (1.01;1.45) | 1.13 (0.93;1.37) |
| Adjusted HR (95% CI)**     | 1.13 (1.06;1.19) | 1.07 (1.02;1.12) | 1.20 (1.02;1.41) | 1.08 (0.87;1.33) | 1.06 (0.88;1.27) | 0.98 (0.81;1.20) |
| <b>Venous disease</b>      |                  |                  |                  |                  |                  |                  |
| Crude HR (95% CI)          | 1.12 (0.98;1.28) | 1.14 (1.02;1.27) | 1.26 (0.90;1.77) | 1.59 (1.05;2.42) | 1.17 (0.79;1.74) | 1.13 (0.72;1.77) |
| Adjusted HR (95% CI)*      | 1.03 (0.91;1.18) | 1.08 (0.97;1.21) | 1.07 (0.77;1.50) | 1.42 (0.93;2.15) | 1.01 (0.69;1.50) | 1.03 (0.66;1.61) |
| Adjusted HR (95% CI)**     | 0.94 (0.83;1.08) | 0.99 (0.88;1.11) | 1.03 (0.74;1.44) | 1.36 (0.90;2.07) | 0.93 (0.63;1.38) | 0.97 (0.62;1.52) |
| <b>All-cause mortality</b> |                  |                  |                  |                  |                  |                  |
| Crude HR (95% CI)          | 1.03 (0.99;1.07) | 0.99 (0.95;1.03) | 0.90 (0.81;1.01) | 0.76 (0.67;0.87) | 1.03 (0.92;1.15) | 1.10 (0.99;1.22) |
| Adjusted HR (95% CI)*      | 1.10 (1.06;1.14) | 1.07 (1.03;1.12) | 1.03 (0.92;1.15) | 0.89 (0.79;1.02) | 1.15 (1.03;1.29) | 1.26 (1.14;1.39) |
| Adjusted HR (95% CI)**     | 1.01 (0.97;1.05) | 0.99 (0.95;1.03) | 1.00 (0.90;1.12) | 0.89 (0.78;1.01) | 1.15 (1.02;1.29) | 1.11 (1.00;1.23) |

\*: adjusted for age at entry. \*\*: adjusted for age at entry, index year, marital status at entry, diabetes, hypertension, chronic obstructive pulmonary disorders, dyslipidemia and Charlson comorbidity index conditions.  
RVO= Retinal vein occlusion, BRVO= Branch retinal vein occlusion, CRVO= Central retinal vein occlusion, CVD= Cardiovascular diseases

**eFigure 1: No. of retinal vein occlusion diagnoses per year**

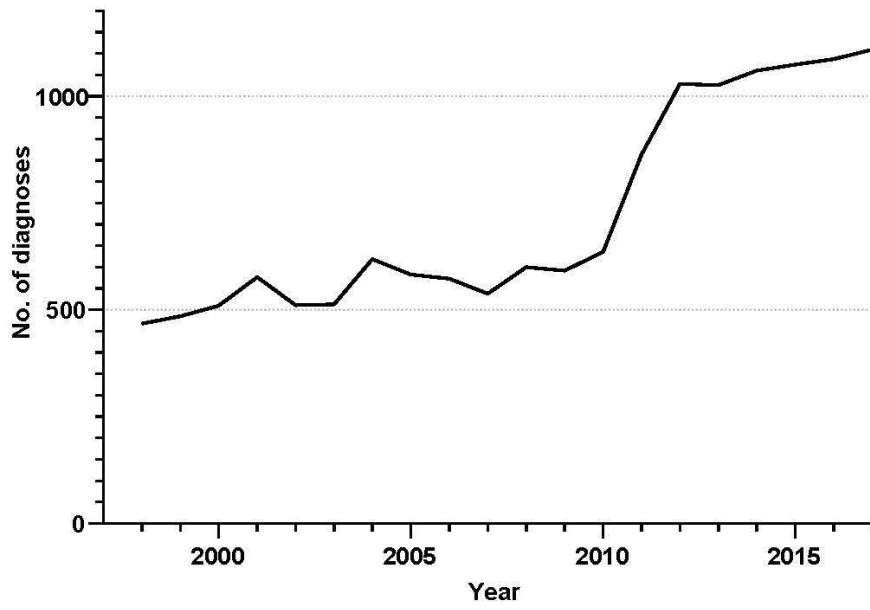

Supplement: bjophthalmol-2022-321225supp001_data_supplement.pdf [file bjophthalmol-2022-321225supp001_data_supplement.pdf]
